# Supplementary material for: Numerical investigation of parameters influencing back-thrust development in outer wedge fronts of fold-and-thrust belt systems
Source: Copernicus journal article supplement (doi:10.5194/se-16-1041-2025), 2025-10-08
Supplement: Supplementary file [file se-16-1041-2025-supplement-title-page.pdf › se-16-1041-2025-supplement-title-page.pdf]

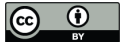

## *Supplement of*

# **Numerical investigation of parameters influencing back-thrust development in outer wedge fronts of fold-and-thrust belt systems**

**Saeed Mahmoodpour et al.**

*Correspondence to:* Saeed Mahmoodpour ([saeed.mahmoodpour@tum.de](mailto:saeed.mahmoodpour@tum.de))

- [se-16-1041-2025-supplement-title-page.pdf](#)
- Sample-case1
  - [sample-case1.elf](#)
    - \* [sample-case1.hmf](#)
    - \* [sample-case1.pre](#)
  - [sup-material.use](#)
- [Supplementary materials.pdf](#)

The copyright of individual parts of the supplement might differ from the article licence.
